# Supplementary material for: Detecting Introgressed Populations in the Iberian Endemic Centaurea podospermifolia through Genome Size
Source: MDPI journal article supplement (doi:10.3390/plants10081492), 2021-07-21
Supplement: s1 [file s1]

**Table S1.** Genome size data for each of the individuals of *Centaurea cephalariifolia*, *C. ×loscosii* and *C. podospermifolia* at Cardó and Ports Massifs (Catalonia, Spain).

| Species                   | Population | Individual | 2C (pg) | <sup>1</sup> SD | <sup>2</sup> CV <sub>std</sub> | <sup>3</sup> CV <sub>plant</sub> |
|---------------------------|------------|------------|---------|-----------------|--------------------------------|----------------------------------|
| <i>C. cephalariifolia</i> | OH 614     | 1          | 7.60    | 0.00            | 2.36                           | 2.41                             |
| <i>C. cephalariifolia</i> | OH 614     | 2          | 7.71    | 0.02            | 3.40                           | 4.00                             |
| <i>C. cephalariifolia</i> | OH 614     | 3          | 7.66    | 0.00            | 2.71                           | 2.94                             |
| <i>C. cephalariifolia</i> | OH 614     | 4          | 7.61    | 0.01            | 2.79                           | 3.09                             |
| <i>C. cephalariifolia</i> | OH 614     | 5          | 7.71    | 0.01            | 3.04                           | 3.61                             |
| <i>C. cephalariifolia</i> | OH 616     | 1          | 7.58    | 0.01            | 2.55                           | 2.61                             |
| <i>C. cephalariifolia</i> | OH 616     | 2          | 7.64    | 0.00            | 2.39                           | 2.63                             |
| <i>C. cephalariifolia</i> | OH 616     | 3          | 7.74    | 0.00            | 2.15                           | 2.35                             |
| <i>C. cephalariifolia</i> | OH 616     | 4          | 7.52    | 0.00            | 2.12                           | 2.42                             |
| <i>C. cephalariifolia</i> | OH 616     | 5          | 7.58    | 0.01            | 2.53                           | 2.54                             |
| <i>C. ×loscosii</i>       | OH 613     | 1          | 7.86    | 0.02            | 2.77                           | 2.73                             |
| <i>C. ×loscosii</i>       | OH 613     | 2          | 8.04    | 0.01            | 2.56                           | 2.86                             |
| <i>C. ×loscosii</i>       | OH 613     | 3          | 7.70    | 0.03            | 2.58                           | 2.73                             |
| <i>C. ×loscosii</i>       | OH 613     | 4          | 7.97    | 0.00            | 2.41                           | 2.71                             |
| <i>C. ×loscosii</i>       | OH 613     | 5          | 8.01    | 0.01            | 2.44                           | 2.72                             |
| <i>C. ×loscosii</i>       | OH 613     | 6          | 7.94    | 0.00            | 2.71                           | 2.72                             |
| <i>C. ×loscosii</i>       | OH 613     | 7          | 7.96    | 0.00            | 2.81                           | 2.72                             |
| <i>C. ×loscosii</i>       | OH 613     | 8          | 8.04    | 0.00            | 2.56                           | 3.14                             |
| <i>C. ×loscosii</i>       | OH 617     | 1          | 7.88    | 0.05            | 3.30                           | 2.89                             |
| <i>C. ×loscosii</i>       | OH 617     | 2          | 7.90    | 0.03            | 2.25                           | 2.59                             |
| <i>C. ×loscosii</i>       | OH 617     | 3          | 7.82    | 0.01            | 2.32                           | 2.31                             |
| <i>C. ×loscosii</i>       | OH 617     | 4          | 7.79    | 0.03            | 2.60                           | 2.89                             |
| <i>C. ×loscosii</i>       | OH 617     | 5          | 7.76    | 0.01            | 2.72                           | 2.67                             |
| <i>C. podospermifolia</i> | OH 618     | 1          | 7.80    | 0.01            | 2.79                           | 2.58                             |
| <i>C. podospermifolia</i> | OH 618     | 2          | 7.90    | 0.01            | 3.04                           | 2.83                             |
| <i>C. podospermifolia</i> | OH 618     | 3          | 7.80    | 0.01            | 2.80                           | 2.31                             |
| <i>C. podospermifolia</i> | OH 618     | 4          | 7.93    | 0.01            | 2.88                           | 2.90                             |
| <i>C. podospermifolia</i> | OH 618     | 5          | 7.81    | 0.02            | 2.73                           | 2.89                             |
| <i>C. podospermifolia</i> | OH 619     | 1          | 7.95    | 0.01            | 3.20                           | 3.29                             |
| <i>C. podospermifolia</i> | OH 619     | 2          | 7.88    | 0.00            | 2.70                           | 2.64                             |
| <i>C. podospermifolia</i> | OH 619     | 3          | 7.88    | 0.03            | 2.85                           | 2.71                             |
| <i>C. podospermifolia</i> | OH 619     | 4          | 7.83    | 0.00            | 2.92                           | 3.02                             |
| <i>C. podospermifolia</i> | OH 619     | 5          | 7.87    | 0.00            | 2.69                           | 2.92                             |
| <i>C. podospermifolia</i> | OH 621     | 1          | 5.93    | 0.01            | 2.39                           | 2.50                             |
| <i>C. podospermifolia</i> | OH 621     | 2          | 5.87    | 0.00            | 2.74                           | 2.86                             |
| <i>C. podospermifolia</i> | OH 621     | 3          | 5.86    | 0.02            | 3.29                           | 3.08                             |
| <i>C. podospermifolia</i> | OH 621     | 4          | 5.79    | 0.01            | 3.21                           | 3.13                             |
| <i>C. podospermifolia</i> | OH 621     | 5          | 5.87    | 0.04            | 3.24                           | 3.17                             |
| <i>C. podospermifolia</i> | OH 621     | 6          | 5.87    | 0.00            | 2.78                           | 2.84                             |
| <i>C. podospermifolia</i> | OH 621     | 7          | 5.85    | 0.00            | 2.23                           | 2.27                             |
| <i>C. podospermifolia</i> | OH 621     | 8          | 5.87    | 0.02            | 2.81                           | 2.73                             |
| <i>C. podospermifolia</i> | OH 621     | 9          | 5.92    | 0.01            | 2.97                           | 3.16                             |
| <i>C. podospermifolia</i> | OH 621     | 10         | 5.97    | 0.01            | 2.78                           | 3.38                             |

<sup>1</sup>SD: standard deviation. <sup>2</sup>CV<sub>std</sub>: coefficient of variation of the standard (in %). <sup>3</sup>CV<sub>std</sub>: coefficient of variation of the *Centaurea* samples (in %).
